# Supplementary material for: Increased Expression of DNA2 Was Linked to Poor Prognosis in Breast Cancer
Source: Dis Markers. 2021 Jan 26;2021:8860728. doi: 10.1155/2021/8860728 (PMC7857872; doi:10.1155/2021/8860728)
Supplement: Supplementary Materials — Supplementary Table 1 The clinicopathological parameters of cases used in IHC. Supplementary Figure 1. The DNA2 expression exhibited a distinct pattern in breast cancer subtypes. A. The statistic chart showed DNA2 expression among Sorlie's subtypes of breast cancer from the analysis results from bc-GenExMiner. B.The statistic chart showed DNA2 expression among breast cancer subtypes from the analysis results from cBioPortal. [file 8860728.f1.docx]

**Supplemental Information**

**Increased Expression of DNA2 was Linked to Poor Prognosis in Breast cancer**

Yingyan Han1, Zeyu Zhang1, Zhi Wang1, Shujuan Sun1*

Supplementary description:

**Supplementary Table 1 The clinicopathological parameters of cases used in IHC.**

**Supplementary Figure 1. The DNA2 expression exhibited a distinct pattern in breast cancer subtypes. A.** The statistic chart showed DNA2 expression among Sorlie’s subtypes of breast cancer from the analysis results from bc-GenExMiner. **B.**The statistic chart showed DNA2 expression among breast cancer subtypes from the analysis results from cBioPortal

**Table S1**

|  |
| --- |
| | **Clinical characteristics** | | | | | --- | --- | --- | --- | | **Breast malignant tumor** | Gender | Female | 26 | | | Age | ≤50 | 12 | | >50 | 14 | | Pathology | Intraductal carcinoma | 26 | | Histological grade | I | 3 | | II | 16 | | III | 4 | | ER | Negative | 13 | | Positive | 13 | | PR | Negative | 13 | | Positive | 13 | | HER2 | Negative | 7 | | Positive | 19 | | Lymph node | Negative | 13 | | Positive | 13 | | **Breast benign tumor** | Gender | Female | 7 | | | Age | <50 | 3 | | ≥50 | 7 | |

**Supplementary Table 1 The clinicopathological parameters of cases used in IHC.**

**Figure S1**


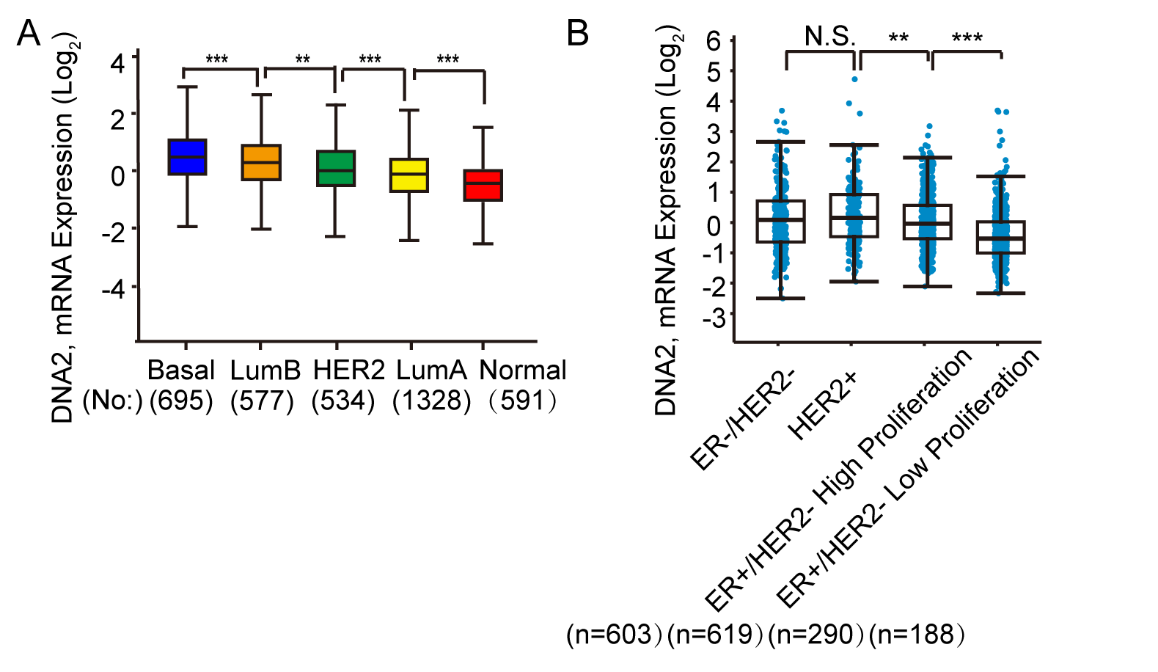


**Supplementary Figure 1. The DNA2 expression exhibited a distinct pattern in breast cancer subtypes. A.** The statistic chart showed DNA2 expression among Sorlie’s subtypes of breast cancer from the analysis results from bc-GenExMiner. **B.**The statistic chart showed DNA2 expression among breast cancer subtypes from the analysis results from cBioPortal.
